# Supplementary material for: Pedigree analysis and estimates of effective breeding size characterize sea lamprey reproductive biology
Source: PubMed Central journal article supplement (PMC8965388; doi:10.1111/eva.13364), 2022-03-15

# Supplmental Figure 1A: Black Mallard River

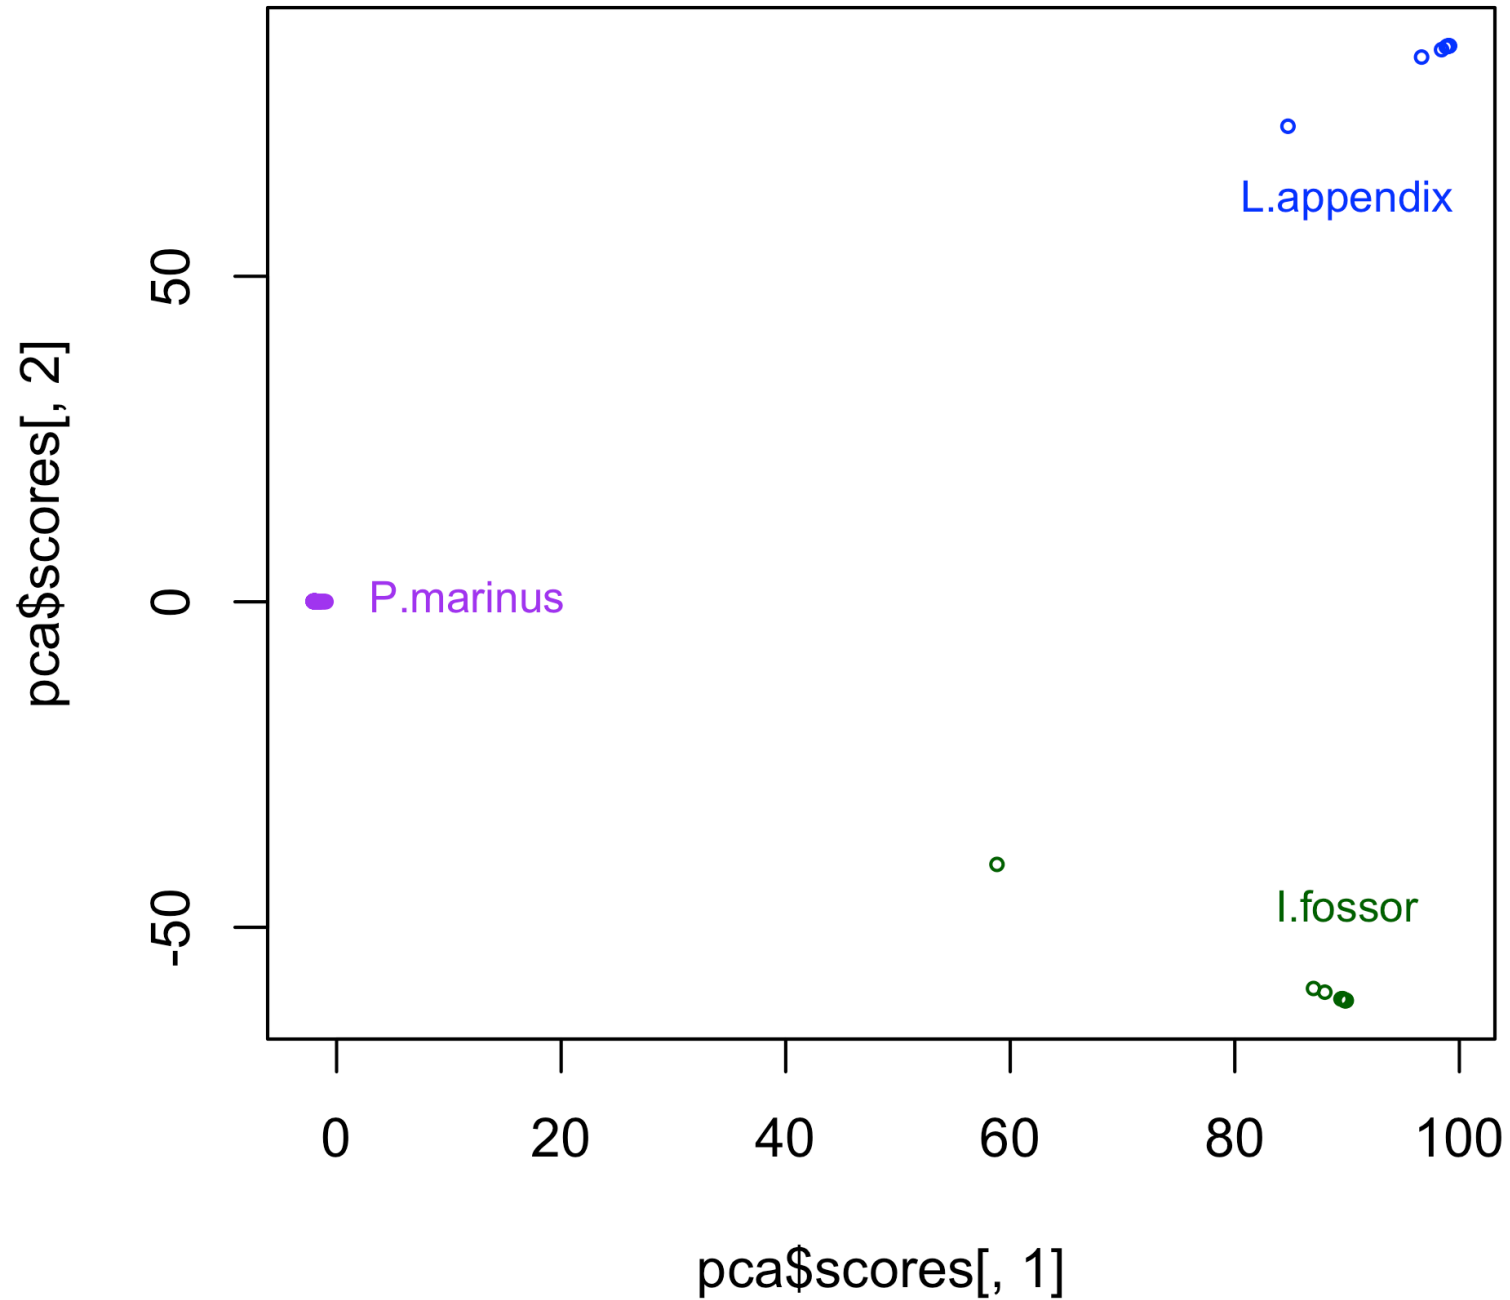

# Supplemental Figure 1B: Ocqueoc River

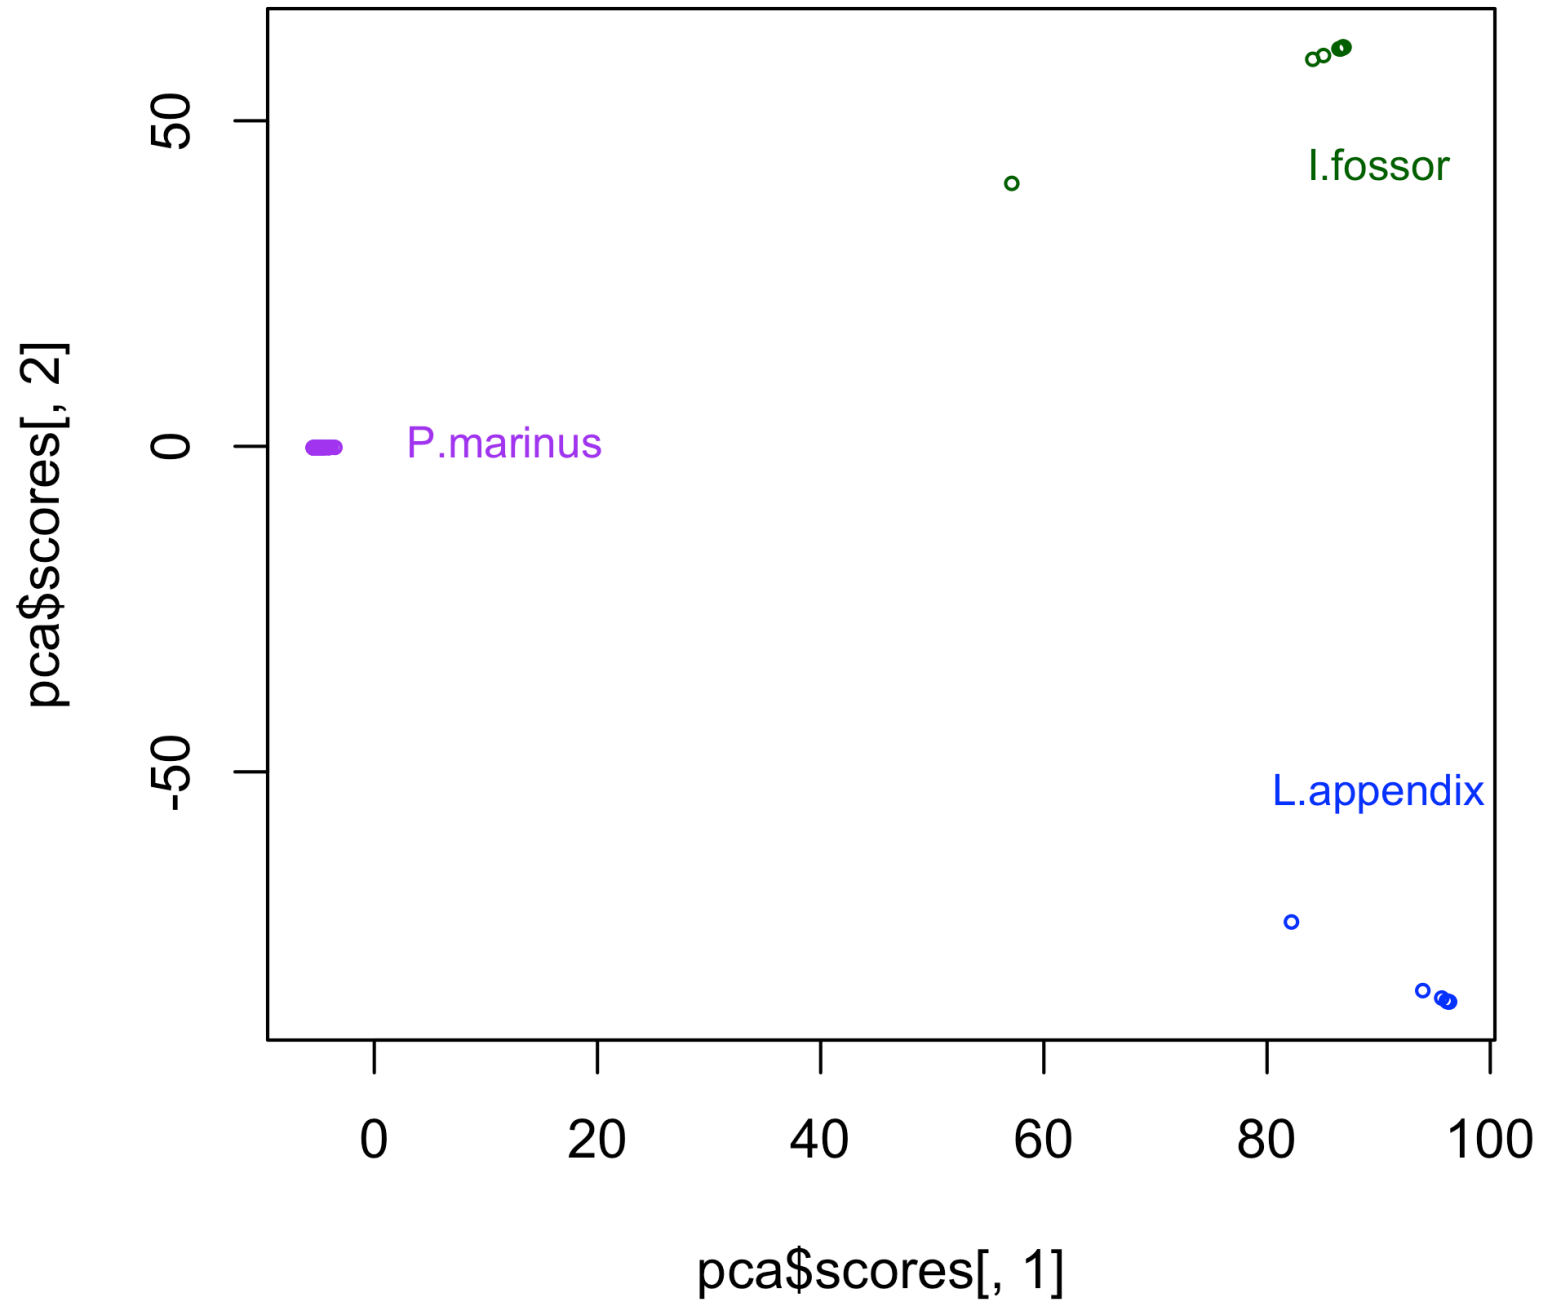

# Supplemental Figure 1C: Pigeon River

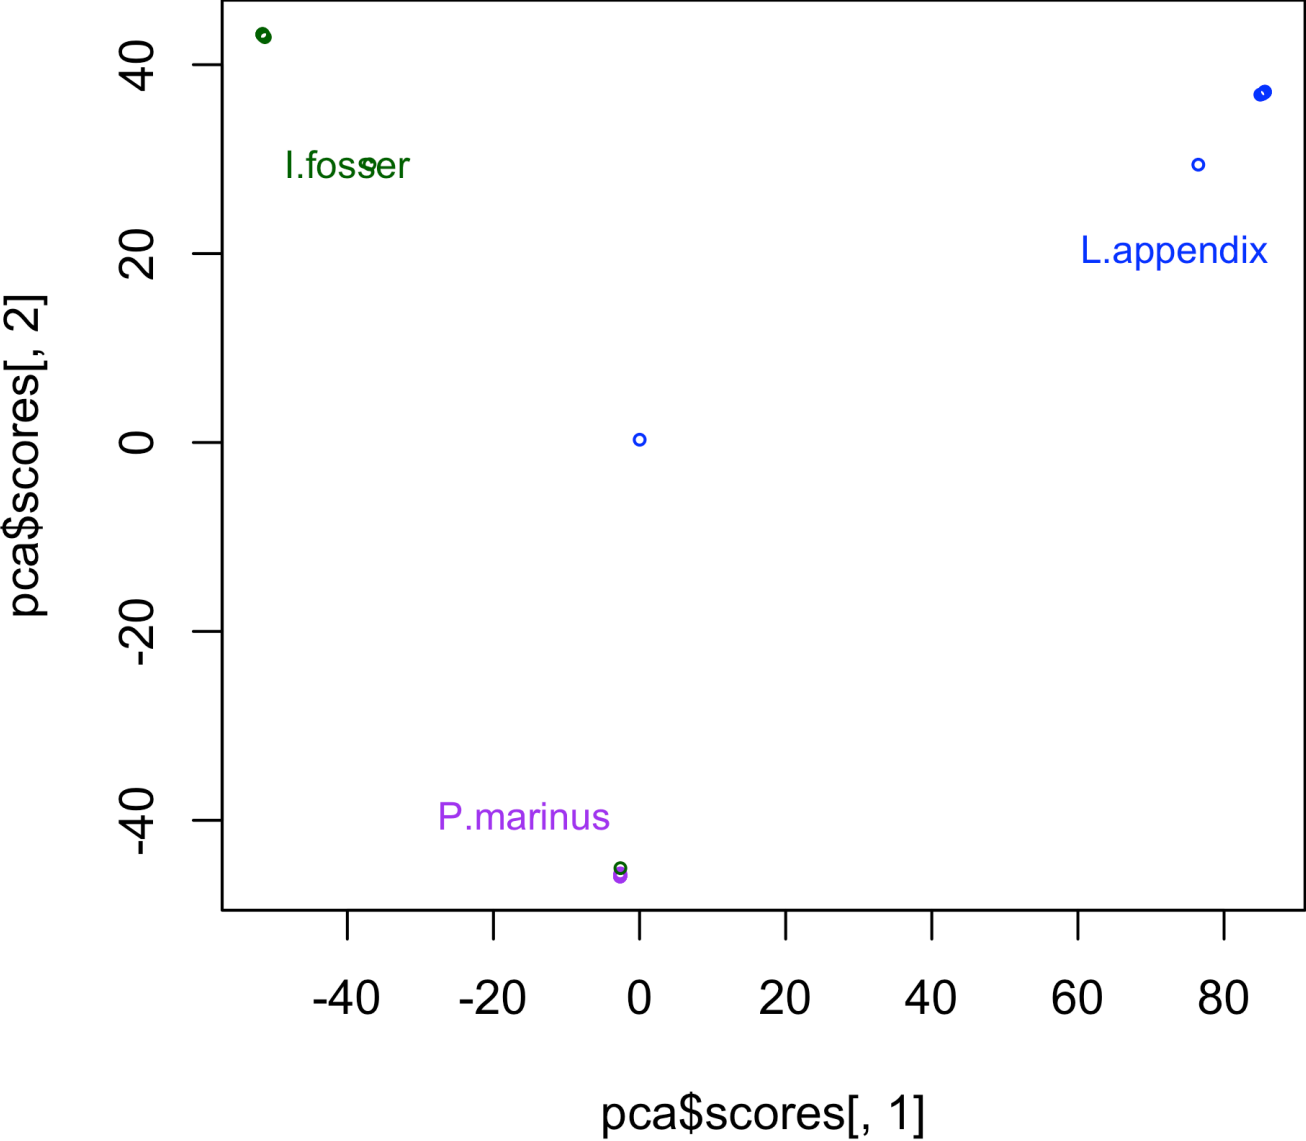

Supplement: EVA-15-484-s001.pdf [file EVA-15-484-s001.pdf]
